# Supplementary material
Source: PubMed Central journal article supplement (PMC2879105)
Supplement: blood-2009-08-236851_1.pdf [file blood-2009-08-236851_1.pdf]

|                                           | CD45 <sup>+</sup> / CD11b <sup>+</sup> cells (%) |               | CD45 <sup>+</sup> / CD11b <sup>-</sup> cells (%) |              |
|-------------------------------------------|--------------------------------------------------|---------------|--------------------------------------------------|--------------|
|                                           | BSA-PBS group                                    | tPA group     | BSA-PBS group                                    | tPA group    |
| CD184 <sup>+</sup> / VEGFR-1 <sup>+</sup> | 49.53 ± 1.91                                     | 72.09 ± 0.45* | 50.48 ± 1.91                                     | 27.91 ± 0.45 |
| CD184 <sup>+</sup>                        | 32.67 ± 0.09                                     | 57.58 ± 1.62* | 67.34 ± 0.09                                     | 42.42 ± 1.62 |
| VEGFR-1 <sup>+</sup>                      | 24.99 ± 1.82                                     | 43.04 ± 0.49* | 75.01 ± 1.82                                     | 56.96 ± 0.49 |
| c-Kit <sup>+</sup>                        | 63.63 ± 3.15                                     | 76.93 ± 1.03* | 36.37 ± 3.12                                     | 23.07 ± 1.03 |
| c-Kit <sup>+</sup> / VEGFR-1 <sup>+</sup> | 81.68 ± 3.59                                     | 94.32 ± 2.84* | 18.32 ± 3.59                                     | 5.68 ± 2.84  |

PB mononuclear cells (PBMCs), isolated from tPA-treated or control C57BL/6 mice, were stained with antibodies against CD45, CD11b, VEGFR-1, CD184 (CXCR4) and c-Kit and analyzed by FACS on day 2 (n = 3; P < 0.05). The frequency of CD11b subpopulations coexpressing VEGFR-1, CD184 (CXCR-4) or c-Kit was determined.
