# Supplementary material
Source: PubMed Central journal article supplement (PMC2879105)
Supplement: blood-2009-08-236851_2.pdf [file blood-2009-08-236851_2.pdf]

|               |      | CD11b <sup>+</sup> cells ( VEGFR-1 <sup>+</sup> cells ) ( ×10 <sup>5</sup> ) | CD11b <sup>+</sup> cells ( VEGFR-1 <sup>-</sup> cells ) ( ×10 <sup>6</sup> ) |
|---------------|------|------------------------------------------------------------------------------|------------------------------------------------------------------------------|
| BSA-PBS group | Day1 | 1.82 ± 0.18 ( 0.30 ± 0.03 )                                                  | 1.48 ± 0.15 ( 1.62 ± 0.16 )                                                  |
|               | Day2 | 1.73 ± 0.26 ( 0.28 ± 0.04 )                                                  | 1.40 ± 0.21 ( 1.55 ± 0.23 )                                                  |
| tPA group     | Day1 | 4.18 ± 0.49 ( 0.99 ± 0.12 )                                                  | 1.78 ± 0.21 ( 2.10 ± 0.25 )                                                  |
|               | Day2 | 4.79 ± 0.83 ( 1.12 ± 0.17 )                                                  | 2.00 ± 0.30 ( 2.37 ± 0.37 )                                                  |

C57BL/6 mice were treated with rtPA or vehicle from day 0 until day 2. PBMCs were isolated and labeled with CD45, CD11b or VEGFR-1 antibodies and then isolated using MACS. The absolute number of cells isolated from 400 µl blood are given (n = 4; \*P < 0.05, \*\*P < 0.001 vs. vehicle).
